# Supplementary material
Source: PubMed Central journal article supplement (PMC4382672)
Supplement: NIHMS669911-supplement-Table_1.pdf [file NIHMS669911-supplement-Table_1.pdf]

**Table 1. Expression of R-cadherin in clinical breast cancer specimens**

| Case             | Intraductal            |                        |                    | Invasive  |           |        | Cyto <sup>4</sup> |
|------------------|------------------------|------------------------|--------------------|-----------|-----------|--------|-------------------|
|                  | Cells (%) <sup>1</sup> | Intensity <sup>2</sup> | Score <sup>3</sup> | Cells (%) | Intensity | Score  |                   |
| 1                | 100                    | 3                      | 1.00               | 90        | 2         | 0.60   |                   |
| 2                | 95                     | 3                      | 0.95               | 90        | 2         | 0.60   |                   |
| 3                |                        |                        |                    | 90        | 2         | 0.60   | +                 |
| 4                |                        |                        |                    | 70        | 2         | 0.47   |                   |
| 5                |                        |                        |                    | 50        | 2         | 0.33   |                   |
| 6                | 30                     | 2                      | 0.20               | 30        | 2         | 0.20   |                   |
| 7                |                        |                        |                    | 60        | 2         | 0.40   |                   |
| 8                |                        |                        |                    | 80        | 2         | 0.53   | +                 |
| 9                |                        |                        |                    | 10        | 1         | 0.03   |                   |
| 10               | 100                    | 3                      | 1.00               | 50        | 2         | 0.33   | +                 |
| 11               |                        |                        |                    | 70        | 2         | 0.47   |                   |
| 12               | 80                     | 3                      | 0.80               | 20        | 2         | 0.13   |                   |
| 13               | 95                     | 3                      | 0.95               | 60        | 3         | 0.60   |                   |
| 14               |                        |                        |                    | 15        | 2         | 0.10   |                   |
| 15               |                        |                        |                    | 80        | 2         | 0.53   | +                 |
| 16               | 70                     | 2                      | 0.47               | 30        | 2         | 0.20   |                   |
| 17               |                        |                        |                    | 70        | 2         | 0.47   |                   |
| 18               | 80                     | 2                      | 0.53               | 60        | 2         | 0.40   |                   |
| Avg              | 81                     | 2.6                    | 0.74               | 57        | 2.0       | 0.39   |                   |
| SD               | 23.4                   | 0.5                    | 0.30               | 26.3      | 0.3       | 0.19   |                   |
| p < <sup>5</sup> |                        |                        |                    | 0.0172    |           | 0.0007 |                   |

<sup>1</sup> Per centage of positive tumor cells

<sup>2</sup> Average staining intensity - 0, 1, 2, or 3

<sup>3</sup> Product of positive tumor cells X intensity, normalized to the maximal value of 300.

<sup>4</sup> Cytoplasmic staining in a significant fraction of tumor cells. Case 15 had only cytoplasmic staining and three others had membrane and cytoplasmic staining.

<sup>5</sup> Comparison Intraductal and Invasive Carcinoma; Student's T-test, one-tailed, equal variance
