# Supplementary material
Source: PubMed Central journal article supplement (PMC4382672)

**A**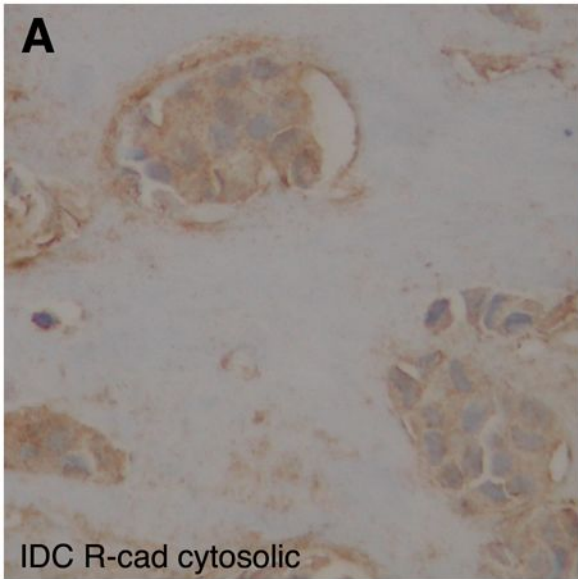

IDC R-cad cytosolic

**B**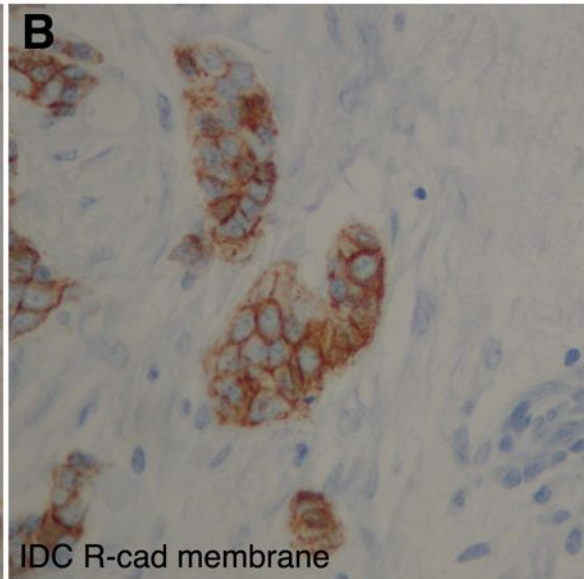

IDC R-cad membrane

(A)

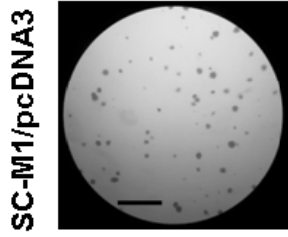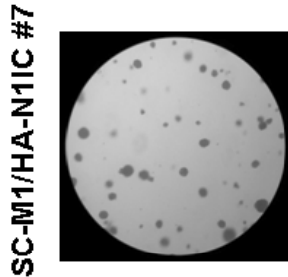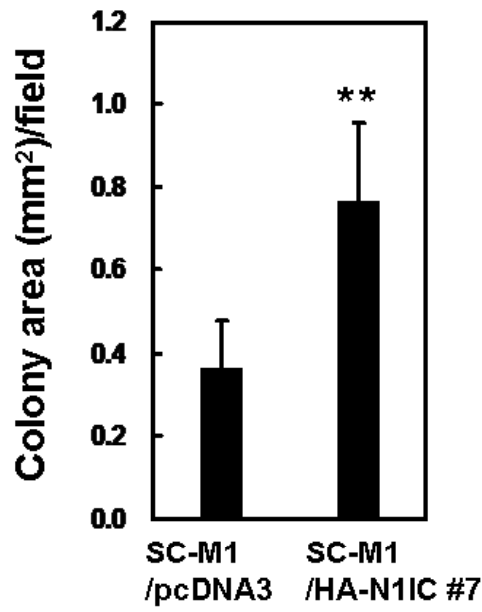

(B)

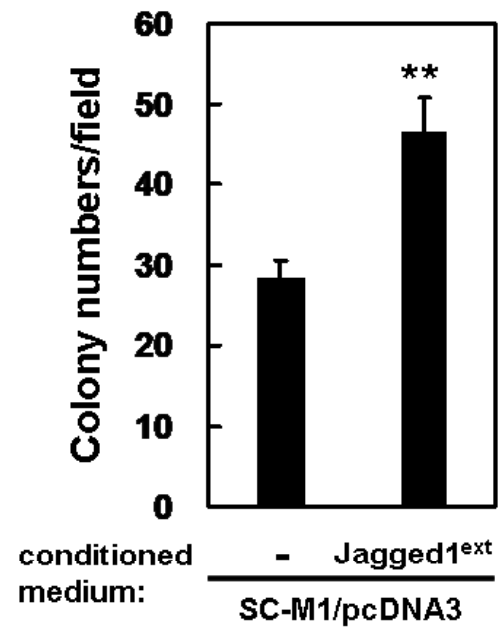

Tien-Shun Yeh, *et al.*, Fig. S3

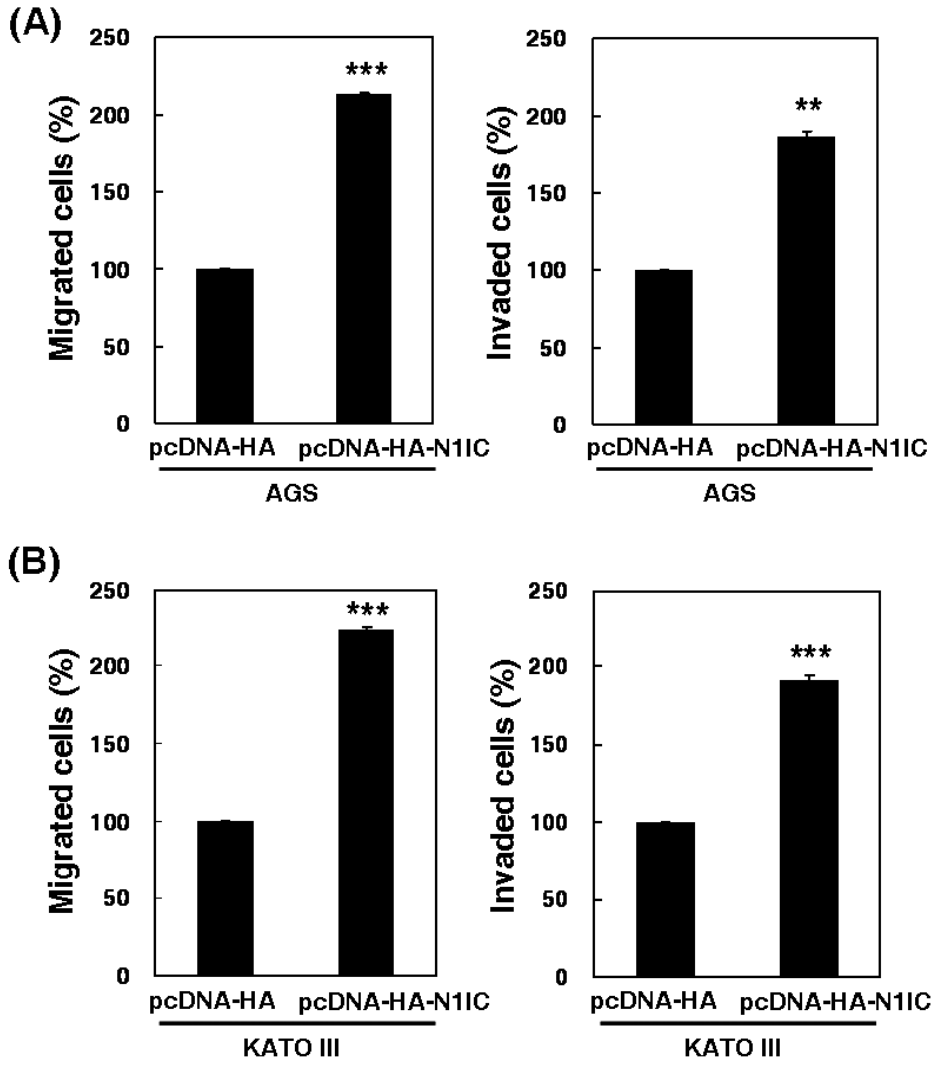

Supplement: NIHMS669911-supplement-1.pdf [file NIHMS669911-supplement-1.pdf]

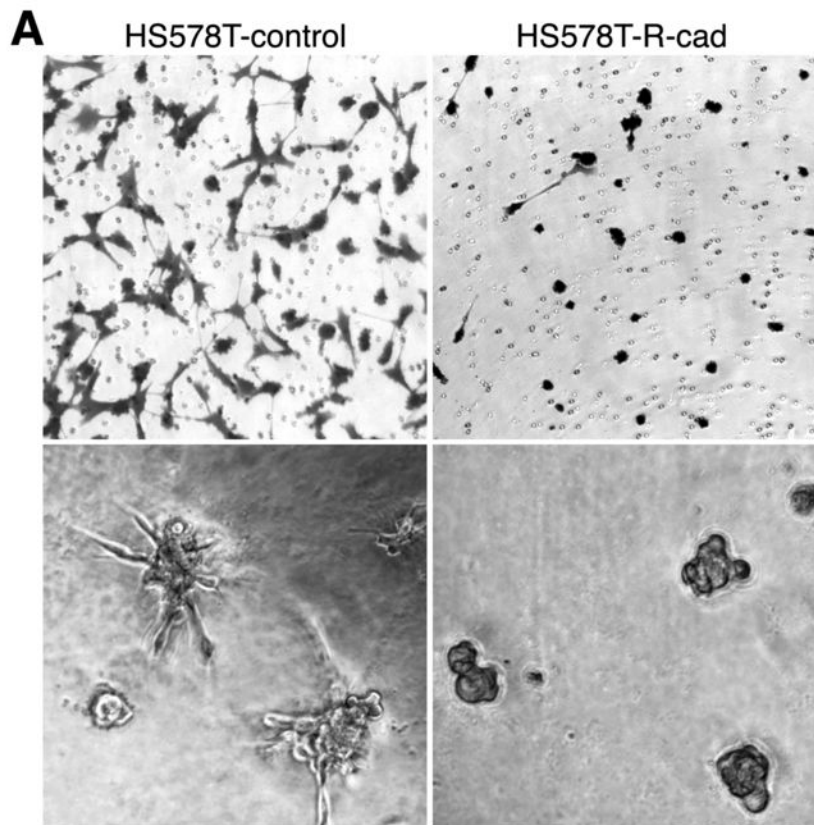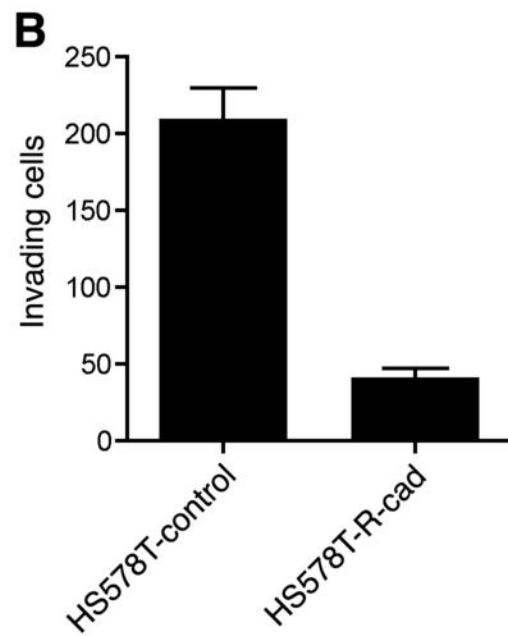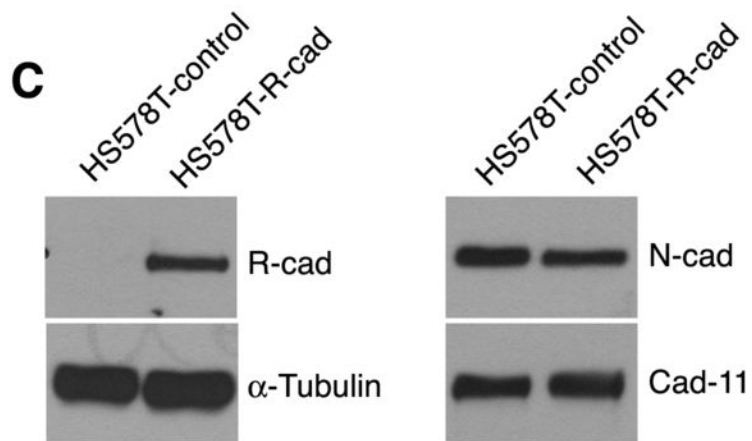

Supplement: NIHMS669911-supplement-2.pdf [file NIHMS669911-supplement-2.pdf]

**A**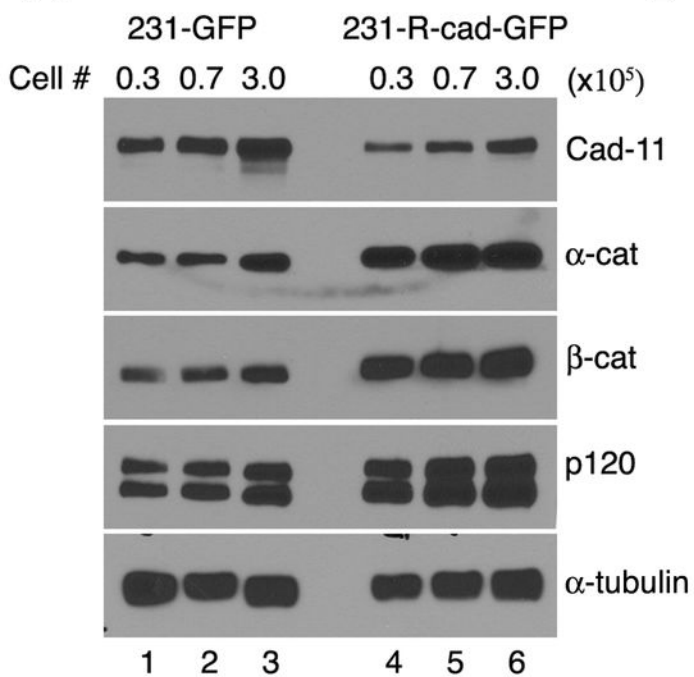**B**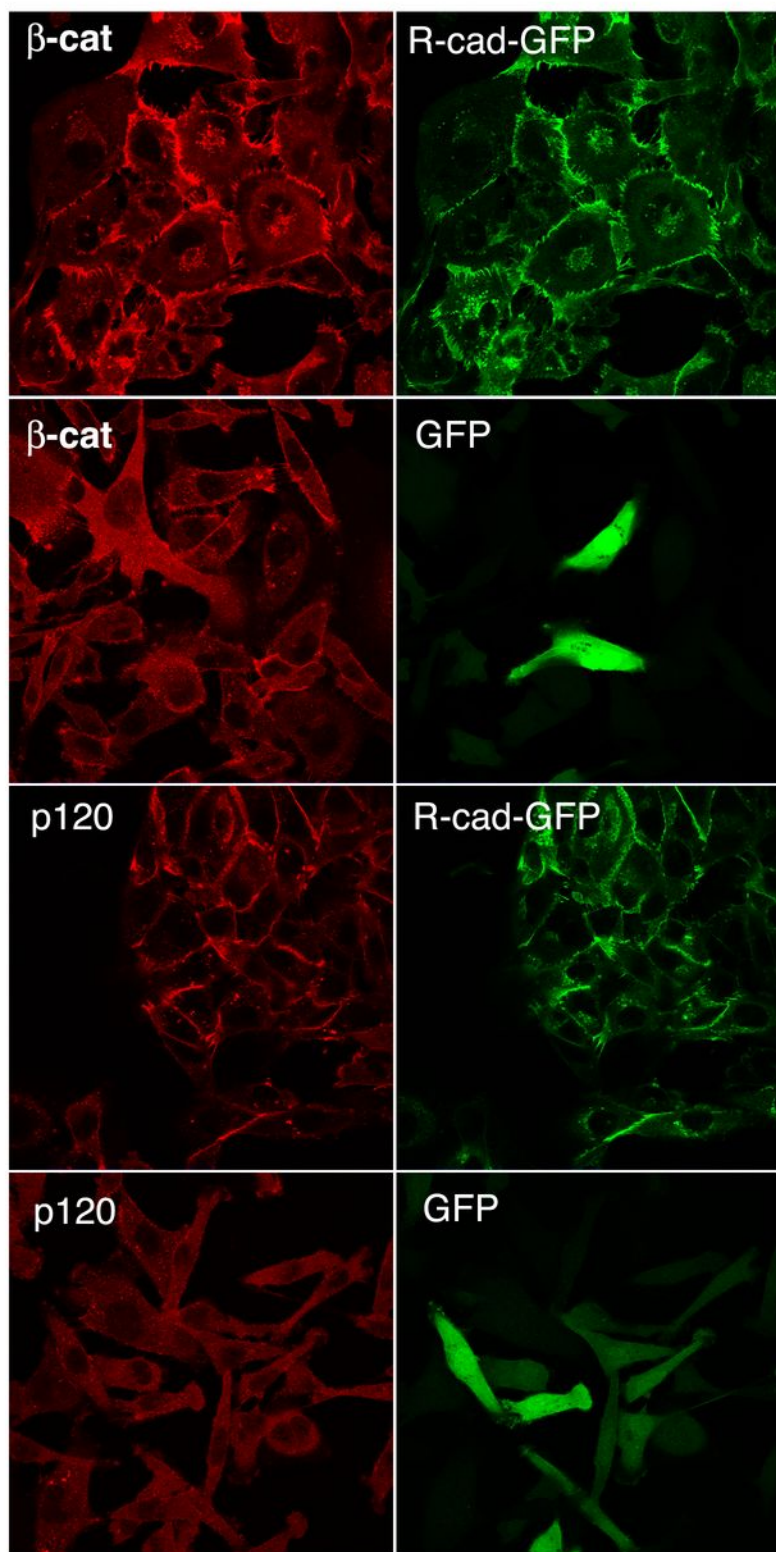

Supplement: NIHMS669911-supplement-3.pdf [file NIHMS669911-supplement-3.pdf]

**A**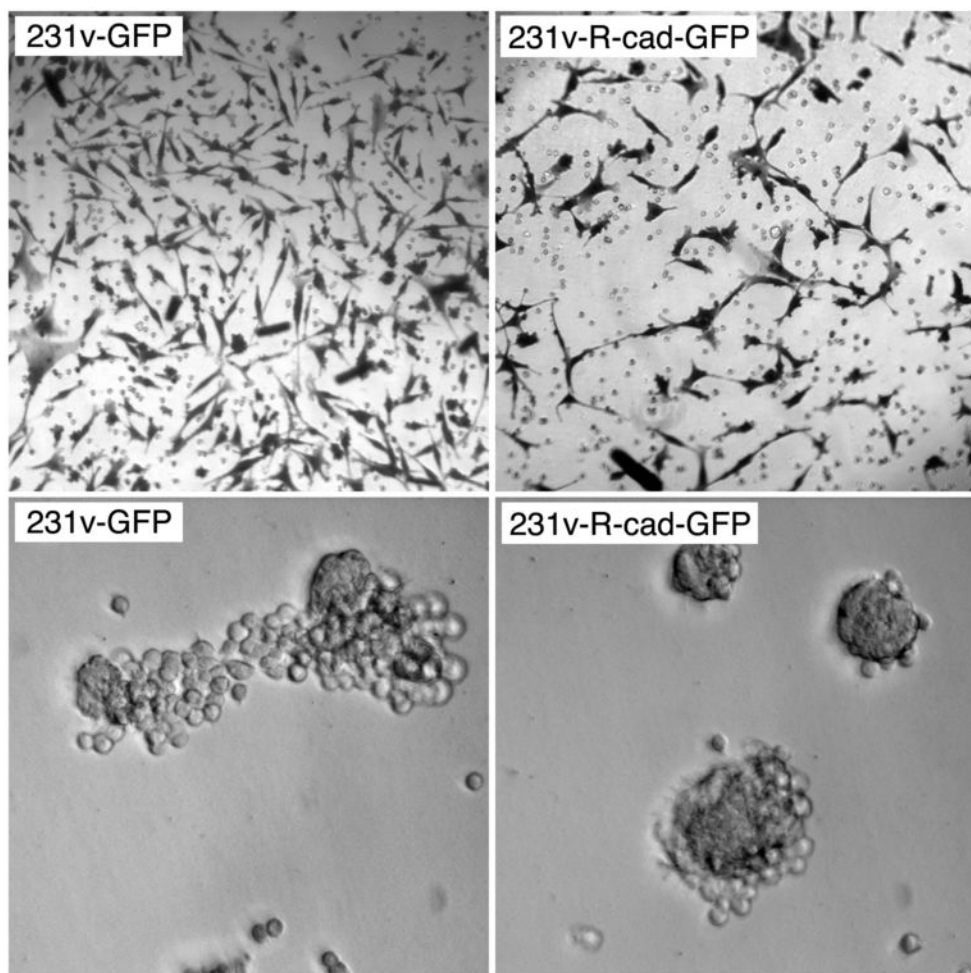**B**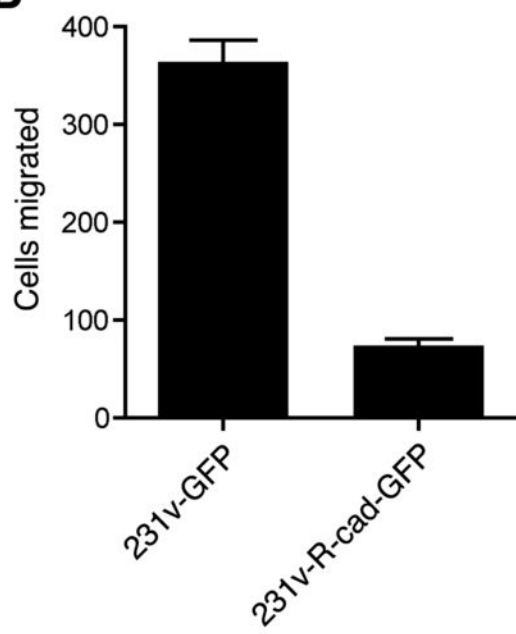**C**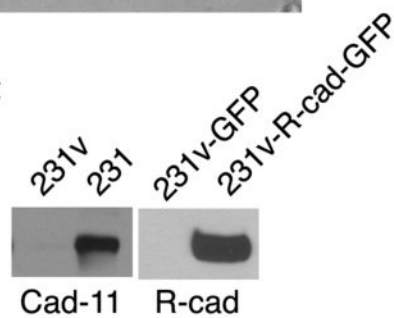**D**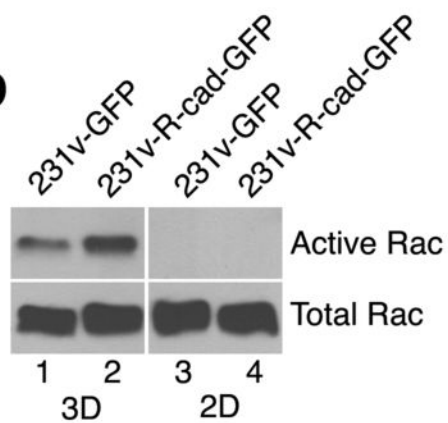

Supplement: NIHMS669911-supplement-4.pdf [file NIHMS669911-supplement-4.pdf]
